# Supplementary material
Source: PubMed Central journal article supplement (PMC3927417)
Supplement: NIHMS551980-supplement-01.pdf [file NIHMS551980-supplement-01.pdf]

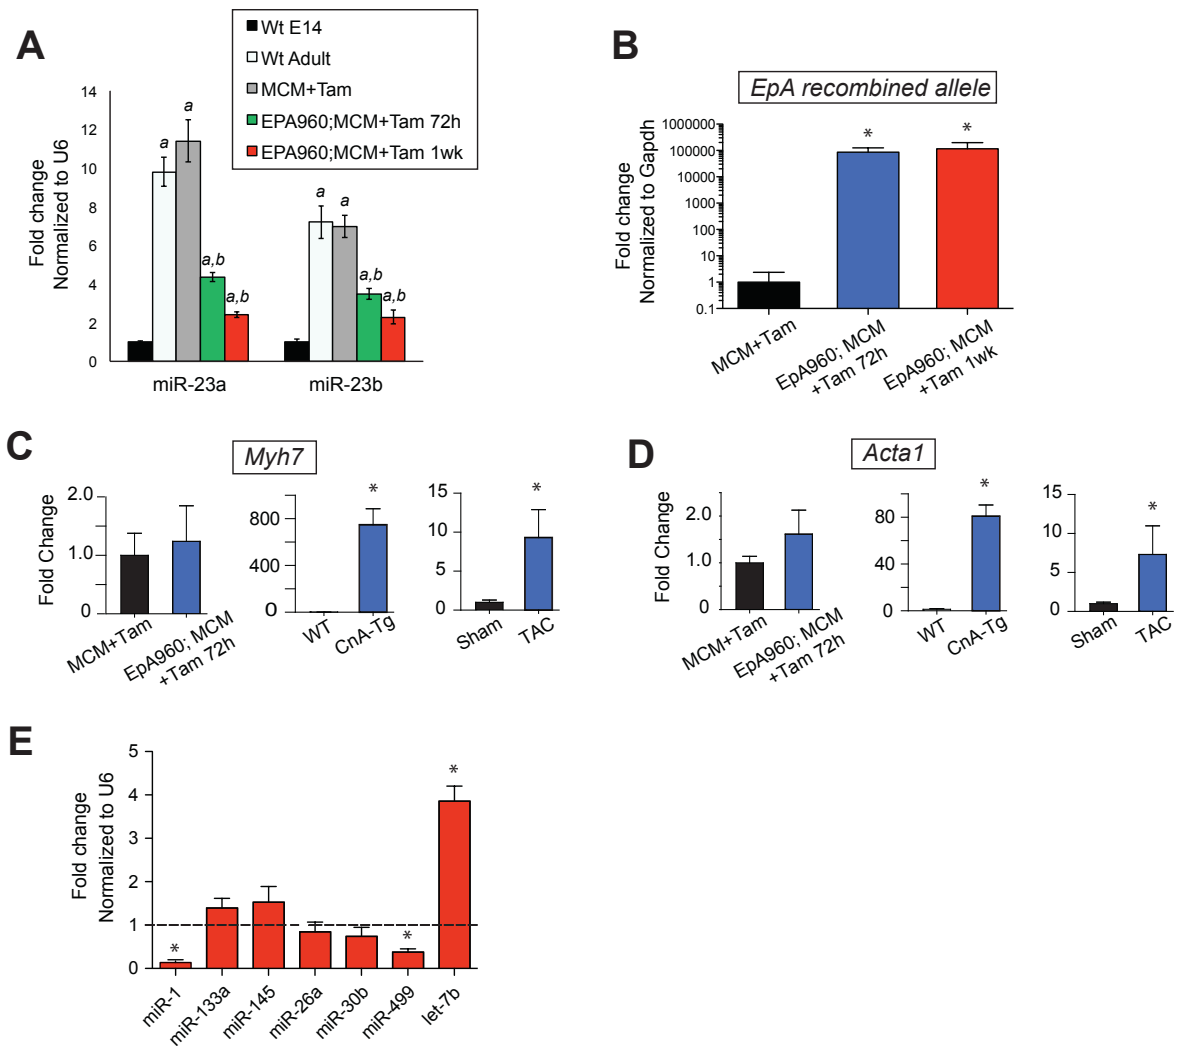

**Figure S1. miRNA, EpA960 recombined allele, *Myh7* and *Acta1* expression in mouse and human DM1 and non-DM1 cardiomyopathies.** (A) Steady state *miR-23a* and *miR-23b* levels during normal mouse heart development and in EpA960; MCM+Tam (DM1) mouse model were determined by real time quantitative PCR (qRT-PCR). Each bar represents fold change in expression (mean  $\pm$  SD) relative to wild type (Wt) embryonic day (E)14. ‘a’ represents significantly different from Wt adult; ‘b’ represents significantly different from Wt E14. Relative expression of cardiac hypertrophy markers (B) Relative expression of the EpA960 recombined allele at 72hr and 1wk following tamoxifen

injection. **(C)** *Myh7* and **(D)** *Acta1* in DM1 mice, Calcineurin transgenic (CnA-Tg) mice and wild type mice after 8 weeks of Transverse Aortic Constriction (TAC). Individual bars represent fold change in *Myh7* or *Acta1* mRNA steady state levels (mean  $\pm$  SD) from heart samples of EpA960;MCM+Tam mice relative to MCM+Tam controls, CnA-Tg mice relative to littermate controls (n=3) or from mice that underwent TAC surgery relative to shams. **(E)** Relative expression of miRNAs in failing human heart samples in comparison to non-disease controls based on qRT-PCR analysis. \* $P < 0.05$ .

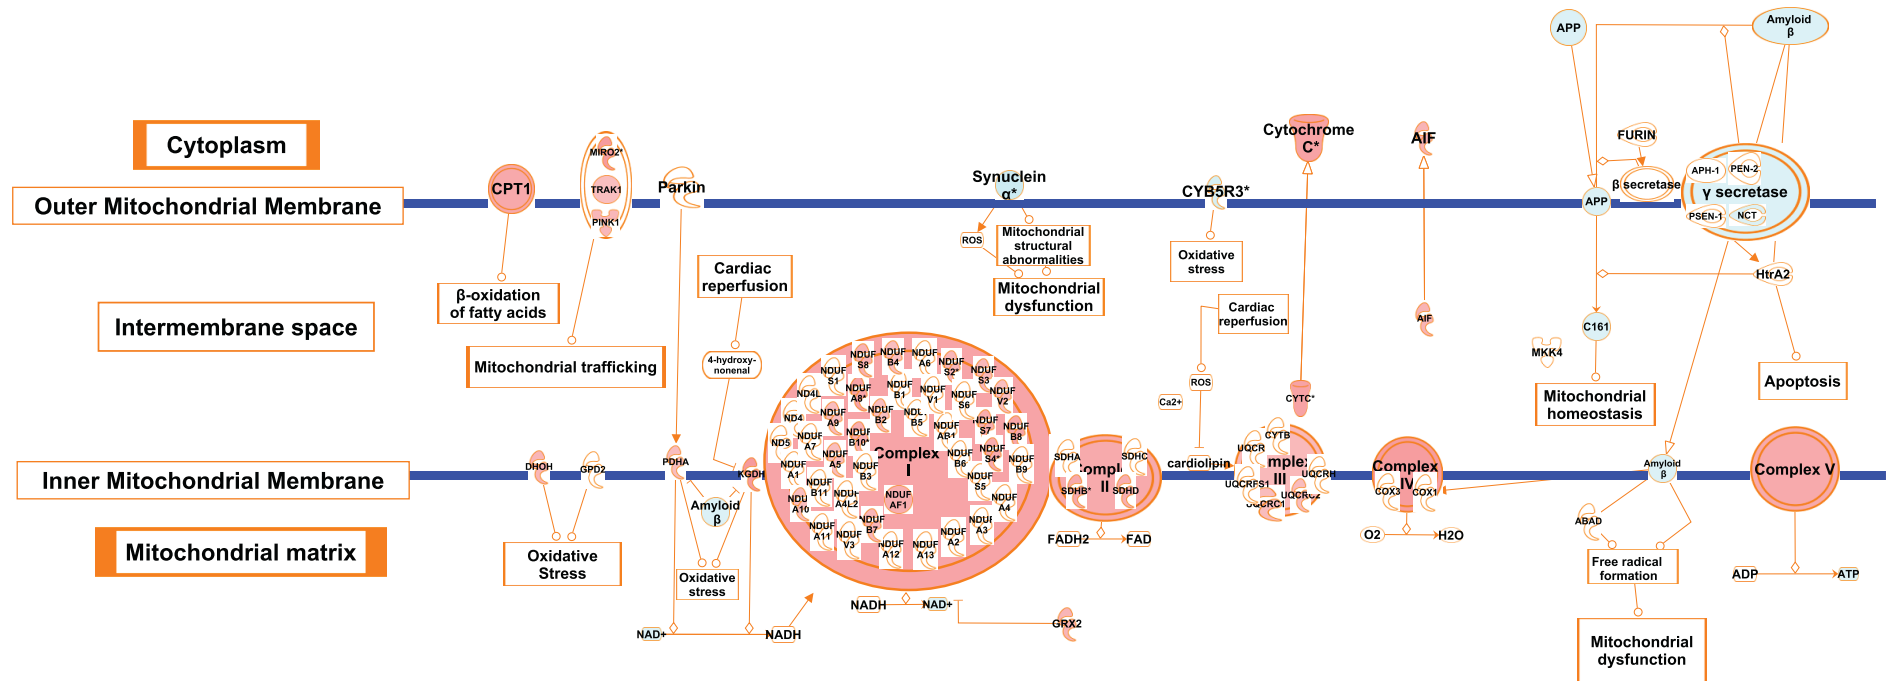

© 2000-2013 Ingenuity Systems, Inc. All rights reserved.

**Figure S2. Ingenuity Pathway Analysis showing genes affected in DM1 mouse hearts regulate mitochondrial function.**

Ingenuity analyses indicated a canonical pathway involving mitochondrial dysfunction as over-represented categories ( $P$  value =  $5.36E-08$ ) in DM1 mouse hearts as compared to controls. Pink/red color of molecules indicates down regulation of genes analyzed in our study, with darker shades of pink represents levels of gene down regulation. Green color indicates up regulated genes. Grey color indicates no change. Forty-five of 174 genes in the pathway were affected in heart tissue from the DM1 mouse model.

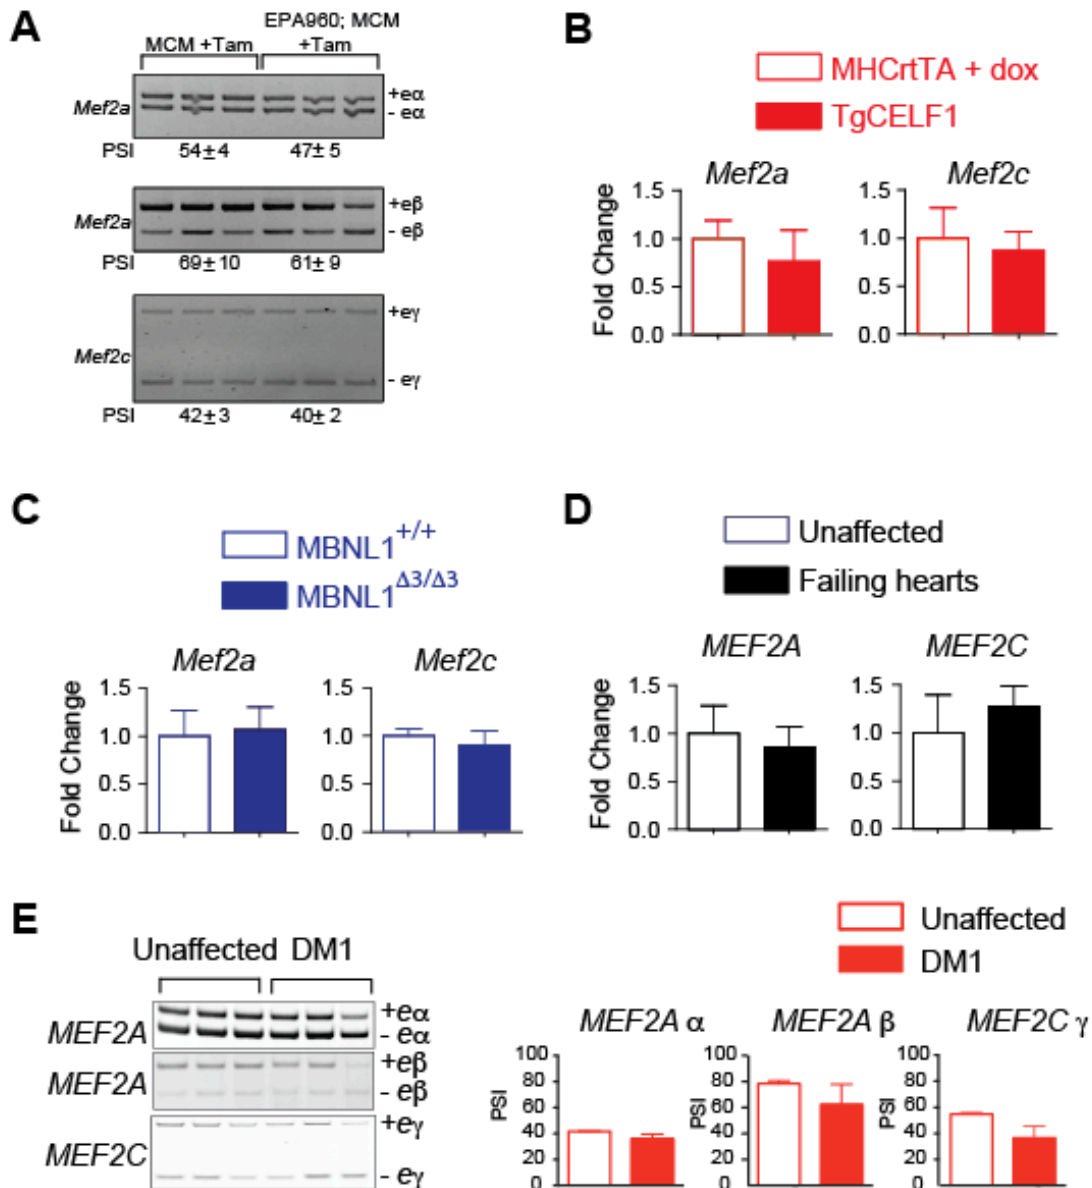

**Figure S3. Mef2A and Mef2c splicing and steady state level expression analysis.** (A) Alternative exons in *Mef2a* ( $\alpha$  &  $\beta$  exons) and *Mef2c* ( $\gamma$  exon) show no significant change in PSI values after 1wk of CUG<sup>exp</sup> RNA expression compared to MCM controls. qRT-PCR analysis of *Mef2a* and *Mef2c* mRNA steady state levels in, (B) TgCELF1 mice relative to MHCrtTA mice given doxycycline (dox), (C) *Mbnl1*<sup>+/+</sup> mice relative to *Mbnl1*<sup>ΔE3/ΔE3</sup> mice and (D) Unaffected human control and failing hearts. Each bar represents fold change in

expression (mean  $\pm$  SD). Data is normalized relative to ribosomal protein L30 (*Rpl30*).

n=3. (E) Alternative splicing of MEF2A and MEF2C in unaffected or DM1 hearts.

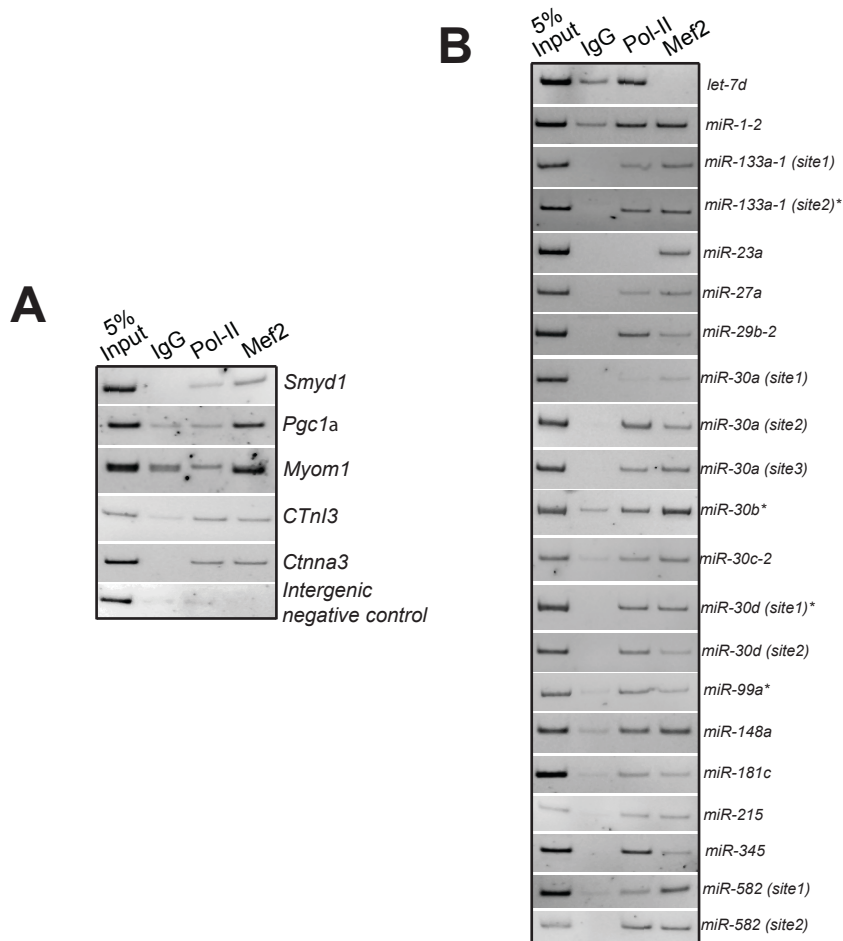

**Figure S4. Mef2 proteins bind to genomic regions surrounding several miRNAs in heart.** Chromatin Immunoprecipitation (ChIP) was performed using a RNA Pol II, Mef2 or control IgG on wild type adult mouse hearts as described in the Methods section. PCR of the DNA input, RNA Pol II or Mef2 immunoprecipitate, and IgG control precipitate was performed using primers flanking Mef2 consensus sites on each of the miRNAs. The primers used for PCR assays span the Mef2 binding sites in target (A) mRNAs or (B) primary miRNAs.

## SUPPLEMENTAL REFERENCES

Amacher, S.L., Buskin, J.N., and Hauschka, S.D. (1993). Multiple regulatory elements contribute differentially to muscle creatine kinase enhancer activity in skeletal and cardiac muscle. *Mol Cell Biol* 13, 2753-2764.

Anderson, J.P., Dodou, E., Heidt, A.B., De Val, S.J., Jaehnig, E.J., Greene, S.B., Olson, E.N., and Black, B.L. (2004). HRC is a direct transcriptional target of MEF2 during cardiac, skeletal, and arterial smooth muscle development in vivo. *Mol Cell Biol* 24, 3757-3768.

Andres, V., Fisher, S., Wearsch, P., and Walsh, K. (1995). Regulation of Gax homeobox gene transcription by a combination of positive factors including myocyte-specific enhancer factor 2. *Mol Cell Biol* 15, 4272-4281.

Aries, A., Paradis, P., Lefebvre, C., Schwartz, R.J., and Nemer, M. (2004). Essential role of GATA-4 in cell survival and drug-induced cardiotoxicity. *Proc Natl Acad Sci U S A* 101, 6975-6980.

Beason, K.B., Acuff, C.G., Steinhilper, M.E., and Elton, T.S. (1999). An A/T-rich cis-element is essential for rat angiotensin II type 1A receptor transcription in vascular smooth muscle cells. *Biochim Biophys Acta* 1444, 25-34.

Black, B.L., and Cripps, R.M. (2010). Myocyte Enhancer Factor 2 Transcription Factors in Heart Development and Disease. In *Heart Development and Regeneration* (Academic press, Elsevier), pp. 673-699.

Blais, A., Tsikitis, M., Acosta-Alvear, D., Sharan, R., Kluger, Y., and Dynlacht, B.D. (2005). An initial blueprint for myogenic differentiation. *Genes Dev* 19, 553-569.

Charron, F., Paradis, P., Bronchain, O., Nemer, G., and Nemer, M. (1999). Cooperative interaction between GATA-4 and GATA-6 regulates myocardial gene expression. *Mol Cell Biol* 19, 4355-4365.

Cheng, G., Hagen, T.P., Dawson, M.L., Barnes, K.V., and Menick, D.R. (1999). The role of GATA, CArG, E-box, and a novel element in the regulation of cardiac expression of the Na<sup>+</sup>-Ca<sup>2+</sup> exchanger gene. *J Biol Chem* 274, 12819-12826.

Creemers, E.E., Sutherland, L.B., McAnally, J., Richardson, J.A., and Olson, E.N. (2006). Myocardin is a direct transcriptional target of Mef2, Tead and Foxo proteins during cardiovascular development. *Development* 133, 4245-4256.

Czubryt, M.P., McAnally, J., Fishman, G.I., and Olson, E.N. (2003). Regulation of peroxisome proliferator-activated receptor gamma coactivator 1 alpha (PGC-1 alpha ) and mitochondrial function by MEF2 and HDAC5. *Proc Natl Acad Sci U S A* 100, 1711-1716.

Di Lisi, R., Millino, C., Calabria, E., Altruda, F., Schiaffino, S., and Ausoni, S. (1998). Combinatorial cis-acting elements control tissue-specific activation of the cardiac troponin I gene in vitro and in vivo. *J Biol Chem* 273, 25371-25380.

Durham, J.T., Brand, O.M., Arnold, M., Reynolds, J.G., Muthukumar, L., Weiler, H., Richardson, J.A., and Naya, F.J. (2006). Myospryn is a direct transcriptional target for MEF2A that encodes a striated muscle, alpha-actinin-interacting, costamere-localized protein. *J Biol Chem* 281, 6841-6849.

Ewen, E.P., Snyder, C.M., Wilson, M., Desjardins, D., and Naya, F.J. (2011). The Mef2A transcription factor coordinately regulates a costamere gene program in cardiac muscle. *J Biol Chem* 286, 29644-29653.

Grepin, C., Dagnino, L., Robitaille, L., Haberstroh, L., Antakly, T., and Nemer, M. (1994). A hormone-encoding gene identifies a pathway for cardiac but not skeletal muscle gene transcription. *Mol Cell Biol* 14, 3115-3129.

Grepin, C., Nemer, G., and Nemer, M. (1997). Enhanced cardiogenesis in embryonic stem cells overexpressing the GATA-4 transcription factor. *Development* 124, 2387-2395.

Huang, H.T., Brand, O.M., Mathew, M., Ignatiou, C., Ewen, E.P., McCalmon, S.A., and Naya, F.J. (2006). Myomaxin is a novel transcriptional target of MEF2A that encodes a Xin-related alpha-actinin-interacting protein. *J Biol Chem* 281, 39370-39379.

Ip, H.S., Wilson, D.B., Heikinheimo, M., Tang, Z., Ting, C.N., Simon, M.C., Leiden, J.M., and Parmacek, M.S. (1994). The GATA-4 transcription factor transactivates the cardiac muscle-specific troponin C promoter-enhancer in nonmuscle cells. *Mol Cell Biol* 14, 7517-7526.

Kobayashi, S., Lackey, T., Huang, Y., Bisping, E., Pu, W.T., Boxer, L.M., and Liang, Q. (2006). Transcription factor gata4 regulates cardiac BCL2 gene expression in vitro and in vivo. *FASEB J* 20, 800-802.

Kuo, H., Chen, J., Ruiz-Lozano, P., Zou, Y., Nemer, M., and Chien, K.R. (1999). Control of segmental expression of the cardiac-restricted ankyrin repeat protein gene by distinct regulatory pathways in murine cardiogenesis. *Development* 126, 4223-4234.

Liu, M.L., Olson, A.L., Edgington, N.P., Moye-Rowley, W.S., and Pessin, J.E. (1994). Myocyte enhancer factor 2 (MEF2) binding site is essential for C2C12 myotube-specific



expression of the rat GLUT4/muscle-adipose facilitative glucose transporter gene. *J Biol Chem* 269, 28514-28521.

Liu, Z.P., Nakagawa, O., Nakagawa, M., Yanagisawa, H., Passier, R., Richardson, J.A., Srivastava, D., and Olson, E.N. (2001). CHAMP, a novel cardiac-specific helicase regulated by MEF2C. *Dev Biol* 234, 497-509.

McFadden, D.G., Charite, J., Richardson, J.A., Srivastava, D., Firulli, A.B., and Olson, E.N. (2000). A GATA-dependent right ventricular enhancer controls dHAND transcription in the developing heart. *Development* 127, 5331-5341.

Molkentin, J.D., and Markham, B.E. (1993). Myocyte-specific enhancer-binding factor (MEF-2) regulates alpha-cardiac myosin heavy chain gene expression in vitro and in vivo. *J Biol Chem* 268, 19512-19520.

Nakagawa, O., Arnold, M., Nakagawa, M., Hamada, H., Shelton, J.M., Kusano, H., Harris, T.M., Childs, G., Campbell, K.P., Richardson, J.A., et al. (2005). Centronuclear myopathy in mice lacking a novel muscle-specific protein kinase transcriptionally regulated by MEF2. *Genes Dev* 19, 2066-2077.

Nakatsuji, Y., Hidaka, K., Tsujino, S., Yamamoto, Y., Mukai, T., Yanagihara, T., Kishimoto, T., and Sakoda, S. (1992). A single MEF-2 site is a major positive regulatory element required for transcription of the muscle-specific subunit of the human phosphoglycerate mutase gene in skeletal and cardiac muscle cells. *Mol Cell Biol* 12, 4384-4390.

Nemer, G., and Nemer, M. (2003). Transcriptional activation of BMP-4 and regulation of mammalian organogenesis by GATA-4 and -6. *Dev Biol* 254, 131-148.

Phan, D., Rasmussen, T.L., Nakagawa, O., McAnally, J., Gottlieb, P.D., Tucker, P.W., Richardson, J.A., Bassel-Duby, R., and Olson, E.N. (2005). BOP, a regulator of right ventricular heart development, is a direct transcriptional target of MEF2C in the developing heart. *Development* 132, 2669-2678.

Potthoff, M.J., Arnold, M.A., McAnally, J., Richardson, J.A., Bassel-Duby, R., and Olson, E.N. (2007). Regulation of skeletal muscle sarcomere integrity and postnatal muscle function by Mef2c. *Mol Cell Biol* 27, 8143-8151.

Rivkees, S.A., Chen, M., Kulkarni, J., Browne, J., and Zhao, Z. (1999). Characterization of the murine A1 adenosine receptor promoter, potent regulation by GATA-4 and Nkx2.5. *J Biol Chem* 274, 14204-14209.

Rosoff, M.L., and Nathanson, N.M. (1998). GATA factor-dependent regulation of cardiac m2 muscarinic acetylcholine gene transcription. *J Biol Chem* 273, 9124-9129.

Schlesinger, J., Schueler, M., Grunert, M., Fischer, J.J., Zhang, Q., Krueger, T., Lange, M., Tonjes, M., Dunkel, I., and Sperling, S.R. (2011). The cardiac transcription network modulated by Gata4, Mef2a, Nkx2.5, Srf, histone modifications, and microRNAs. *PLoS Genet* 7, e1001313.

Stronach, B.E., Renfranz, P.J., Lilly, B., and Beckerle, M.C. (1999). Muscle LIM proteins are associated with muscle sarcomeres and require dMEF2 for their expression during *Drosophila* myogenesis. *Mol Biol Cell* 10, 2329-2342.

Umetani, M., Mataka, C., Minegishi, N., Yamamoto, M., Hamakubo, T., and Kodama, T. (2001). Function of GATA transcription factors in induction of endothelial vascular cell adhesion molecule-1 by tumor necrosis factor-alpha. *Arteriosclerosis, thrombosis, and vascular biology* 21, 917-922.

Vanpoucke, G., Goossens, S., De Craene, B., Gilbert, B., van Roy, F., and Berx, G. (2004). GATA-4 and MEF2C transcription factors control the tissue-specific expression of the alphaT-catenin gene CTNNA3. *Nucleic Acids Res* 32, 4155-4165.

Yaar, R., Cataldo, L.M., Tzatsos, A., Francis, C.E., Zhao, Z., and Ravid, K. (2002). Regulation of the A3 adenosine receptor gene in vascular smooth muscle cells: role of a cAMP and GATA element. *Molecular pharmacology* 62, 1167-1176.

Zhang, H., Toyofuku, T., Kamei, J., and Hori, M. (2003). GATA-4 regulates cardiac morphogenesis through transactivation of the N-cadherin gene. *Biochem Biophys Res Commun* 312, 1033-1038.
